# Supplementary material for: A novel measurement system for unattended, in situ characterization of carbonaceous aerosols
Source: Copernicus journal article supplement (doi:10.5194/ar-1-65-2023), 2023-12-22
Supplement: Supplementary file 1 [file ar-1-65-2023-supplement.zip]

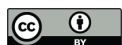

## *Supplement of*

# **A novel measurement system for unattended, in situ characterization of carbonaceous aerosols**

**Alejandro Keller et al.**

*Correspondence to:* Alejandro Keller (alejandro.keller@fhnw.ch)

- ar-1-65-2023-supplement-title-page.pdf

- SI

- fig3abc.csv
- fig3de-120.csv
- fig3de-65s.csv
- fig3de-85.csv
- fig4a-C1.csv
- fig4a-C2.csv
- fig4a-C3.csv
- fig4b-C1.csv
- fig4b-C2.csv
- fig4b-C3.csv
- fig4c.csv
- fig5a.csv
- fig5b.csv
- fig5c.csv
- fig6a.csv
- fig6b.csv
- fig6c.csv

The copyright of individual parts of the supplement might differ from the article licence.
